# Supplementary material for: Increased postural sway during quiet stance as a risk factor for prospective falls in community-dwelling elderly individuals
Source: Oxford University Press journal article supplement (doi:10.1093/ageing/afx083), 2017-05-09
Supplement: afx083_aa-16-1013-File003.docx [file afx083_aa-16-1013-File003.docx]

**Appendix 1**

**Table 3**

Results of sensitivity analyses**.**

| Sensitivity test | EO trial | EC trial |
| --- | --- | --- |
| WBB test-retest reliability (ICC3,1)* | 0.60 (95% CI 0.16–0.81) | 0.94 (95% CI 0.88–0.97) |
| WBB-BBS association (*r*)† | 0.30 (*p* =0.002) | 0.77 (*p* < 0.001) |

*Based on 30 participants who performed retests on the WBB. †Based on 104 participants who performed tests on both balance platforms. EO = eyes open, EC = eyes closed, WBB = Wii Balance Board, ICC = intraclass correlation coefficient, CI = confidence interval, BBS = Biodex Balance System.
